# Supplementary material for: Proteomic Profiling, Transcription Factor Modeling, and Genomics of Evolved Tolerant Strains Elucidate Mechanisms of Vanillin Toxicity in Escherichia coli
Source: PubMed Central journal article supplement (PMC6561319; doi:10.1128/msystems.00163-19), 2019-06-11
Supplement: mSystems.00163-19-st001.pdf [file mSystems.00163-19-st001.pdf]

**Table S1. Primers used in this study.**

| Primer          | Sequence 5' → 3'                            |
|-----------------|---------------------------------------------|
| aaeA_RTPCR_F    | GATGGTGAACAGTATCTGTCCT                      |
| aaeA_RTPCR_R    | GTCGTATTAGTCATTCTGGCC                       |
| aaeB_RTPCR_F    | GCAATACAGCCAATAAATGTG                       |
| aaeB_RTPCR_R    | TGCTAACCAACATATTGCT                         |
| acrA_RTPCR_F    | TAGTAACAGTCAAACTGAACC                       |
| acrA_RTPCR_R    | TTTCGCACTGTCGTATGT                          |
| acrB_RTPCR_F    | TAATTTCTTTATCGATCGCC                        |
| acrB_RTPCR_R    | GTCACTGTTAGAGGACATGTA                       |
| acrD_RTPCR_F    | TCTTTATTGATCGCCCCATT                        |
| acrD_RTPCR_R    | TATCGAGGCCGGTCATATTT                        |
| acrF_RTPCR_F    | TATTCGACGACCGATATTTGC                       |
| acrF_RTPCR_R    | TGTTGATAACCTGCGTCAC                         |
| copA_RTPCR_F    | AAACTATCGACCTGACCCT                         |
| copA_RTPCR_R    | TTTGGGTGGCTTACAGAT                          |
| dkgA_OE_F       | CTTACATATGGCTAATCCAACCGTTATTA               |
| dkgA_OE_R       | CTTACTCGAGGCCGCCGAACCTGGTCA                 |
| gltA_OE_F       | ATTGCATATGGCTGATACAAAAGCAAACTCA             |
| gltA_OE_R       | ATTGCTCGAGACGCTTATGATATCGCTTTAAAG           |
| gltA_sequence_F | ATTTTCACAATGGCACGT                          |
| gltA_sequence_R | GACGGTGAACATGGAAGA                          |
| marA_RTPCR_F    | CAACTGACGCTATTACCA                          |
| marA_RTPCR_R    | GGTTTCTTTTTAAACATCC                         |
| rrsA_RTPCR_F    | ACCAGGGTATCAATCCTGTT                        |
| rrsA_RTPCR_R    | GTTAATACCTTTGCTCATTGA                       |
| soxS_RTPCR_F    | GCATATTGACCAGCCGCTTAA                       |
| soxS_RTPCR_R    | TTACAGGCCGGTGGCGATAATCGCT                   |
| yhbW_OE_F       | ATTATGCTAGCACTGATAAAACCATTGCGTTTT           |
| yhbW_OE_R       | ATTATCTCGAGTCCCAACAACCTCTTCCTTAAC           |
| yhbW_RTPCR_F    | GGAAGTATAAAACCATTGCGT                       |
| yhbW_RTPCR_R    | AGATGCAGCGTGGTGGTAT                         |
| yqhD_OE_F       | ATATTAGCTAGCAACAACCTTAATCTGCACACCCCA        |
| yqhD_OE_R       | ATATTACTCGAGGCCGGCGGCTTCGTATAT              |
| pTRC_HIFI_F     | AAGCTTGGCTGTTTTGGCG                         |
| pTRC_HIFI_R     | GGTCTGTTTCCTGTGTGAAATTG                     |
| pSTV_HIFI_F     | GCATGCAAGCTTGGCACTG                         |
| pSTV_HIFI_R     | TATTTATCCCTTGAATTCGTAATCATGG                |
| pBAD_HIFI_F     | AGCTTGGCTGTTTTGGCGG                         |
| pBAD_HIFI_R     | GGTGAATTCCTCCTGCTAG                         |
| fcsech_STV_F    | CGAATTCAAGGGGATAAATAATGCGTAACCAAGGGCTGGG    |
| fcsech_STV_R    | CCAGTGCCAAGCTTGCATGCCTACTTTTCAGGATCGAATGCAG |
| fcsech_BAD_F    | GCTAGCAGGAGGAATTCACCATGCGTAACCAAGGGCTGGG    |
| fcsech_BAD_R    | TCCGCCAAAACAGCCAAGCTCTACTTTTCAGGATCGAATGCAG |
| S12ech_BAD_F    | GCTAGCAGGAGGAATTCACCATGAGCAAATATGAAGGCCGC   |
| S12ech_BAD_R    | TTGAGGTGGCGGGCCGCCAGGCCGAGGGCCATTGCGAAGC    |
| S12fcs_BAD_F    | CTGGCGGCCCGCCACCTCAA                        |
| S12fcs_BAD_R    | TCCGCCAAAACAGCCAAGCTTCAAGGCCGACCTTGGCGT     |
